# Supplementary material
Source: publisher figshare collection journal article supplement (https://gsapubs.figshare.com/ndownloader/files/22739597)
Supplement: Supplementary file 1 [file 22739597]

GSA Data Repository Item # 7703

Title of article Mechanism of burial metamorphism of argillaceous  
sediments: 3. O-isotope evidence

Author(s) H.-W.Yeh, et al.

see GSA Bulletin v. 88, p. 1321 - 1330

Contents 1 page

## Appendix 1

## GSA Depository # 77-3

## APPENDIX 1.

## CASING DATA FOR CWRU GULF COAST WELLS NOS. 9 AND 10

| Well No. | Sample Depth (meters) | Casing Data and Comments                                                                                                          |
|----------|-----------------------|-----------------------------------------------------------------------------------------------------------------------------------|
| 9        | 305 to 315            | No sidewalls for comparison, but above any diagenesis of illite-smectite clay                                                     |
| 9        | and 745 to 759        |                                                                                                                                   |
| 9        | 1,332 to 1,345        | Immediately below casing; little contamination                                                                                    |
| 9        | 1,817 to 1,826        | Similar to nearby sidewall; little contamination                                                                                  |
| 9        | 2,521 to 2,530        | Similar to nearby sidewall; probably little contamination                                                                         |
| 9        | 3,133 (core)          | No contamination                                                                                                                  |
| 9        | 3,509 to 3,518        | Illite-smectite has lower percent illite layers than sidewalls; possibly contains cavings                                         |
| 10       | 1,204 to 1,213        | Similar to nearby sidewalls; above any significant illite-smectite diagenesis                                                     |
| 10       | 1,677 to 1,686        |                                                                                                                                   |
| 10       | 2,134 to 2,143        |                                                                                                                                   |
| 10       | 2,427 to 2,436        | Not far below casing at 2311 m; probably little contamination                                                                     |
| 10       | 2,774 to 2,784        | Similar to nearby sidewall; probably little contamination                                                                         |
| 10       | 3,421 to 3,430        | Not far below casing at 3085 m; possibly some cavings from below that depth                                                       |
| 10       | 3,631 to 3,640        | No mineralogic data on these particular samples but adjacent ones were similar to nearby sidewalls; probably little contamination |
| 10       | and 4,320 to 4,329    |                                                                                                                                   |
